# Supplementary material for: Stable Ni nanocrystals on porous single-crystalline MgO particles for enhanced dry reforming activity and durability of CH4/CO2
Source: Royal Society of Chemistry journal article supplement (doi:10.1039/d3cy01560b), 2024-01-01
Supplement: d3cy01560b1.pdf [file d3cy01560b1.pdf]

## Supporting Information

### Stable Ni Nanocrystals on Porous Single-Crystalline MgO particles for Enhanced Dry Reforming Activity and Durability of CH<sub>4</sub>/CO<sub>2</sub>

Suning Zhang,<sup>ab</sup> Fangyuan Cheng<sup>\*abc</sup> and Kui Xie<sup>\*abc</sup>

<sup>a</sup> College of Chemistry, Fuzhou University, Fuzhou 350108, Fujian, China.

<sup>b</sup> Key Laboratory of Design & Assembly of Functional Nanostructures, Fujian Institute of Research on the Structure of Matter, Chinese Academy of Sciences, Fuzhou 350002, China.

<sup>c</sup> Fujian Science & Technology Innovation Laboratory for Optoelectronic Information of China, Fuzhou, Fujian 350108, China.

\* Corresponding author: [cfy@fjirsm.ac.cn](mailto:cfy@fjirsm.ac.cn) (F. Cheng), [kxie@fjirsm.ac.cn](mailto:kxie@fjirsm.ac.cn) (K. Xie).

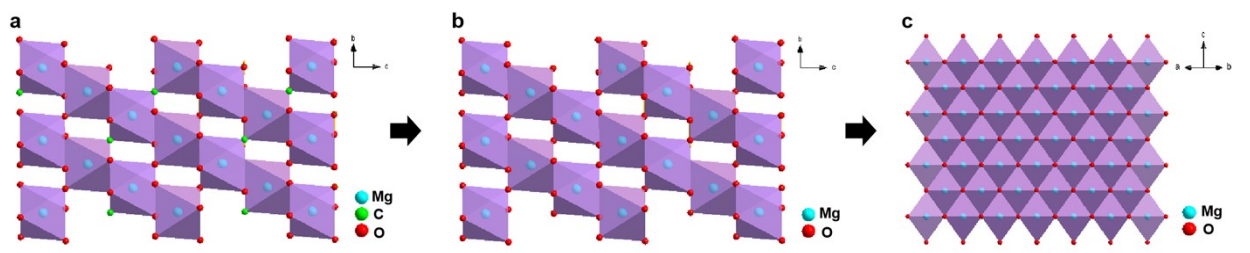

**Figure S1.** (a-c) The growth diagram from SC MgCO<sub>3</sub> particles to PSC MgO particles using the lattice reconstruction strategy.

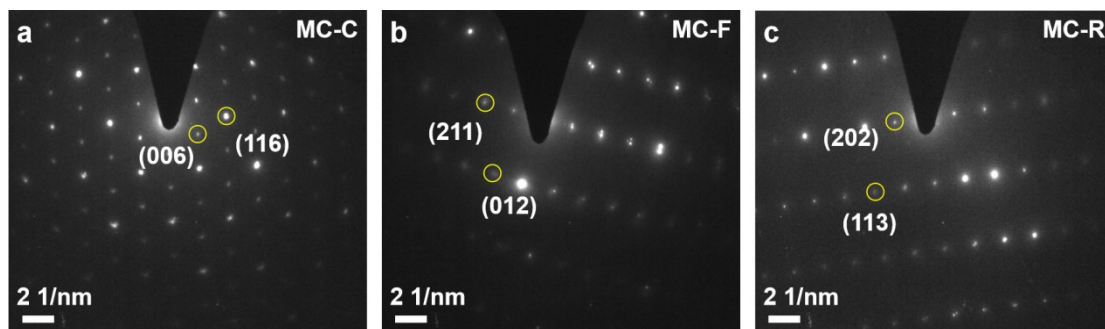

**Figure S2.** (a-c) SAED patterns of MC-C, MC-F and MC-R.

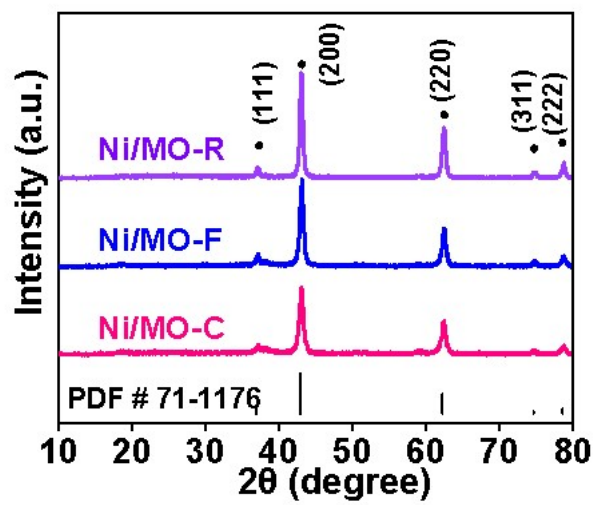

**Figure S3.** XRD patterns of PSC Ni/MgO particles.

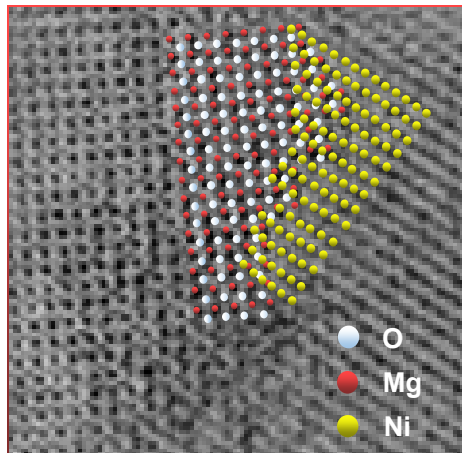

**Figure S4.** HR-TEM image of PSC Ni/MgO with well-defined interface structure.

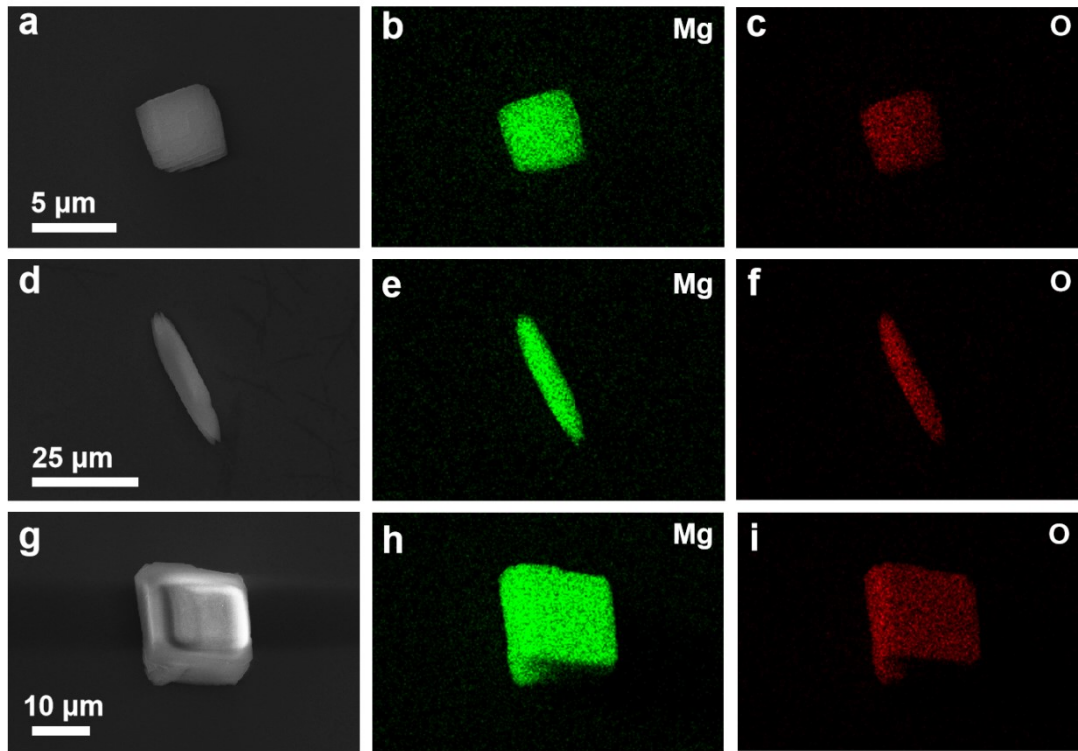

Figure S5. (a-i) Element mappings of PSC MgO particles.

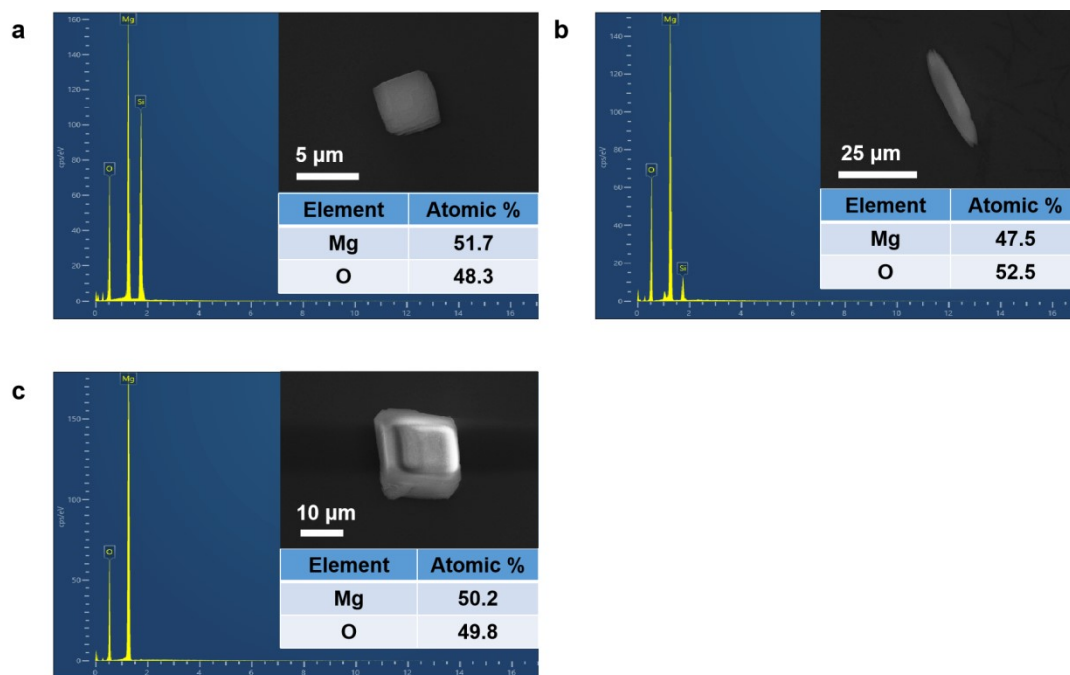

**Figure S6. (a-c)** EDS test of PSC MgO particles with different morphology.

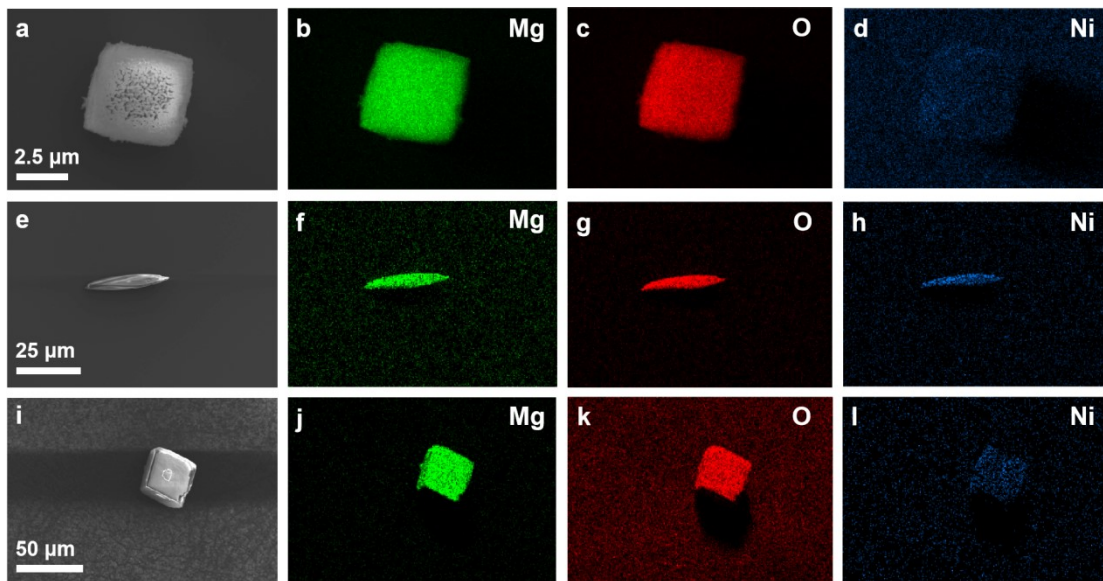

**Figure S7.** (a-l) Element mappings of PSC Ni/MgO particles.



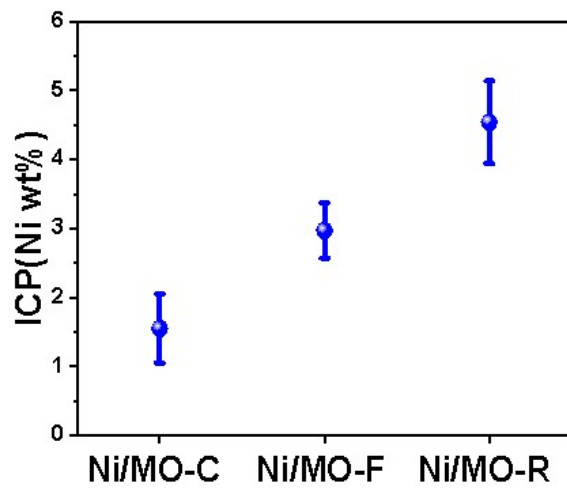

**Figure S8.** PSC Ni/MgO load with different SC Ni nanoparticle contents.

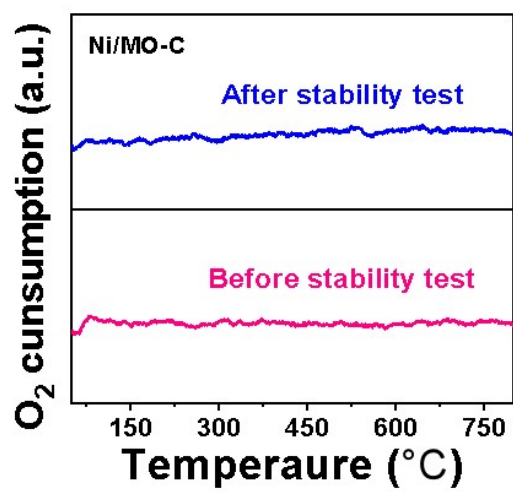

**Figure S9.** The TPO profiles of PSC Ni/MgO before and after 150 hours of DRM long-term testing at 700 °C.

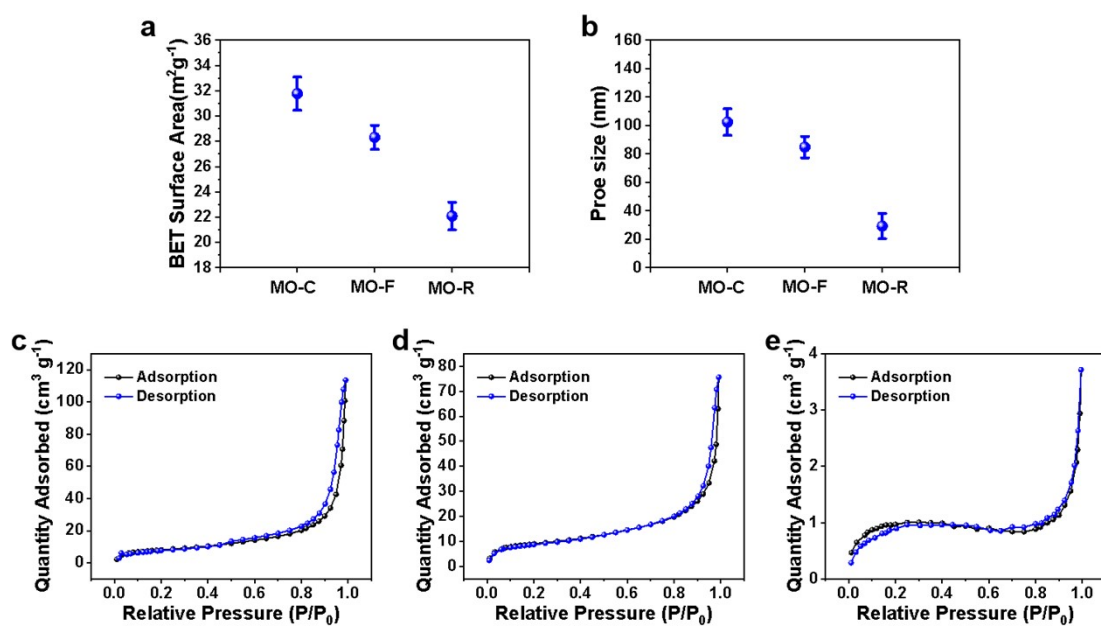

**Figure S10.** (a-b) BET surface area and BJH average pore size of PSC MgO with different morphologies. (c-e) N<sub>2</sub> adsorption-desorption isotherms of MO-C, MO-F, MO-R.

**Table S1.** The comparison of the performance of dry reforming of CO<sub>2</sub>/CH<sub>4</sub> under typical operation conditions.

| Catalyst                                            | Gas composition                                               | WHSV (L·g <sub>cat</sub> <sup>-1</sup> ·h <sup>-1</sup> ) | Temperature | test time | CH <sub>4</sub> Conversion | CO <sub>2</sub> Conversion | H <sub>2</sub> /CO ratio | Ref       |
|-----------------------------------------------------|---------------------------------------------------------------|-----------------------------------------------------------|-------------|-----------|----------------------------|----------------------------|--------------------------|-----------|
| Ni/SiO <sub>2</sub> @Al <sub>2</sub> O <sub>3</sub> | CH <sub>4</sub> /CO <sub>2</sub> /N <sub>2</sub> =<br>1:1:0.2 | 12                                                        | 800 °C      | 100h      | 62.8%                      | 82.3%                      | 0.82                     | [1]       |
| Ni/MgO-SiO <sub>2</sub>                             | CH <sub>4</sub> /CO <sub>2</sub> /Ar=<br>1:1:1                | 18                                                        | 700 °C      | 50h       | 88%                        | 92%                        | 0.75                     | [2]       |
| NiMo/MgO                                            | CH <sub>4</sub> /CO <sub>2</sub> /Ar=<br>1:1:8                | 60                                                        | 800 °C      | 850h      | 100%                       | 100%                       | 1                        | [3]       |
| Ni <sub>3</sub> GaC <sub>0.25</sub>                 | CH <sub>4</sub> /CO <sub>2</sub> /N <sub>2</sub> =<br>1:1:1   | 54                                                        | 600 °C      | 72h       | 48%                        | 52%                        | -                        | [4]       |
| Ni/MgO                                              | CH <sub>4</sub> /CO <sub>2</sub> /Ar=<br>1:1:2                | 80                                                        | 800 °C      | 40h       | 72%                        | -                          | 0.84                     | [5]       |
| Ni/MgO-ZrO <sub>2</sub>                             | CH <sub>4</sub> /CO <sub>2</sub> =1:1<br>.2                   | 60                                                        | 800 °C      | 50h       | 90.5%                      | -                          | 1.6                      | [6]       |
| Ni/MgO (M-1)                                        | CH <sub>4</sub> /CO <sub>2</sub> /Ar=<br>1:1:8                | 24                                                        | 700 °C      | 150h      | ≥95%                       | ≥96%                       | 0.99                     | This work |
| Ni/MgO (M-2)                                        | CH <sub>4</sub> /CO <sub>2</sub> /Ar=<br>1:1:8                | 24                                                        | 700 °C      | 150h      | ≥90%                       | ≥92%                       | 0.96                     | This work |
| Ni/MgO (M-3)                                        | CH <sub>4</sub> /CO <sub>2</sub> /Ar=<br>1:1:8                | 24                                                        | 700 °C      | 150h      | ≥81%                       | ≥89%                       | 0.92                     | This work |

## References

- [1]. J. W. Han, J. S. Park, M. S. Choi and H. Lee, *Applied Catalysis B: Environmental*, 2017, 203, 625-632.
- [2]. Q. Zhang, X. Feng, J. Liu, L. Zhao, X. Song, P. Zhang and L. Gao, *International Journal of Hydrogen Energy*, 2018, 43, 11056-11068.
- [3]. Y. Song, E. Ozdemir, S. Ramesh, A. Adishev, S. Subramanian, A. Harale, M. Albuali, B. A. Fadhel, A. Jamal and D. Moon, *Science*, 2020, 367, 777-781.
- [4]. K. Y. Kim, J. H. Lee, H. Lee, W. Y. Noh, E. H. Kim, E. C. Ra, S. K. Kim, K. An and J. S. Lee, *ACS Catalysis*, 2021, 11, 11091-11102.
- [5]. Y. Fu, W. Kong, B. Pan, C. Yuan, S. Li, H. Zhu and J. Zhang, *Journal of the Energy Institute*, 2022, 105, 214-220.
- [6]. B.-J. Kim, H.-R. Park, Y.-L. Lee, S.-Y. Ahn, K.-J. Kim, G.-R. Hong and H.-S. Roh, *Journal of CO<sub>2</sub> Utilization*, 2023, 68.
